# Supplementary material for: Constructing the hierarchy of predictive auditory sequences in the marmoset brain
Source: eLife journal article supplement (doi:10.7554/elife.74653), 2022-02-17

**A****fMRI 1<sup>st</sup>-level novelty activation****Marmoset 1****Marmoset 2****Marmoset 3**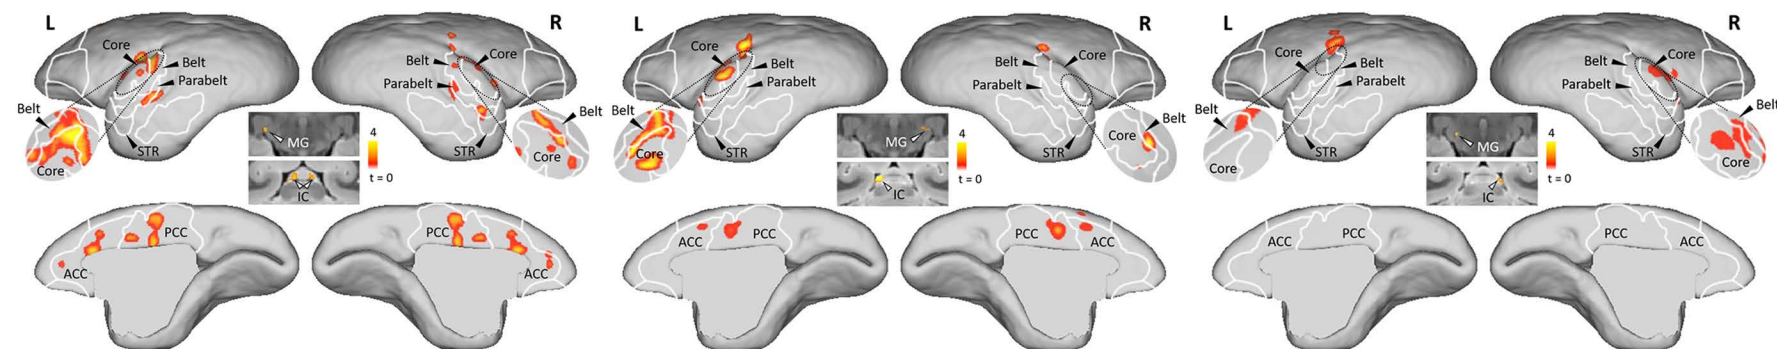

**B** ECoG response:  
 $(xY|xx-xx|xx) \cap (xY|xY-xx|xY)$

**Time-frequency representation**

xY sequence

xx sequence

1<sup>st</sup>-level novelty  
response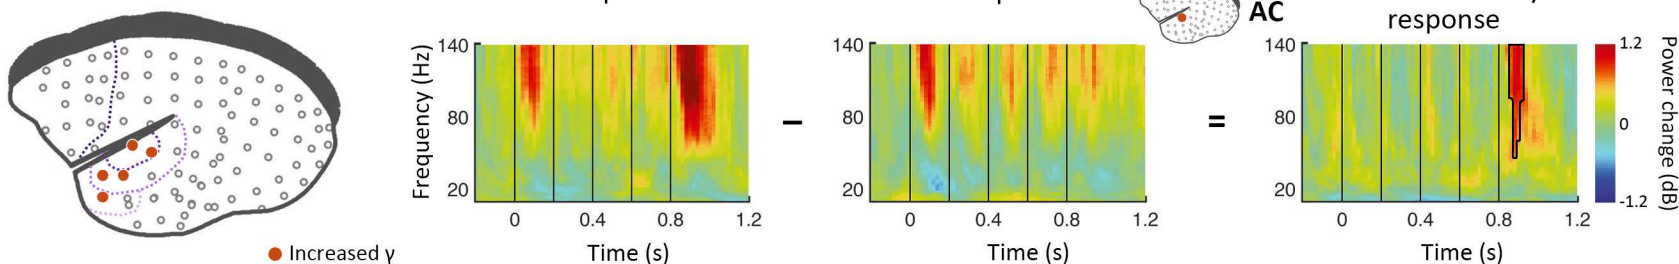**fMRI 2<sup>nd</sup>-level novelty activation in xY task****C****Marmoset 1****Marmoset 2****Marmoset 3**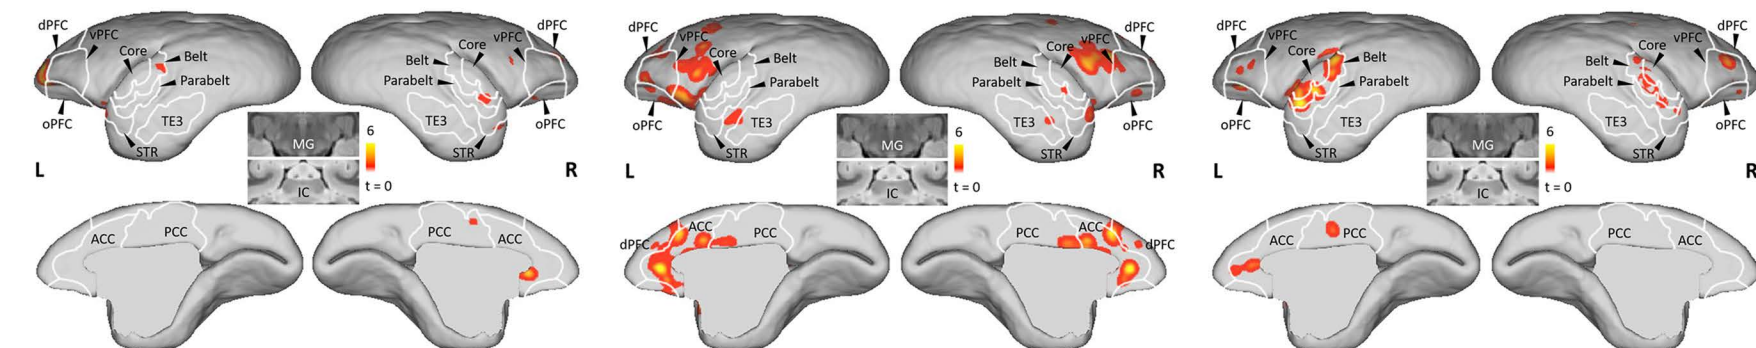**D**

ECoG response:  
 $xx|xY - xY|xY$

**Time-frequency representation**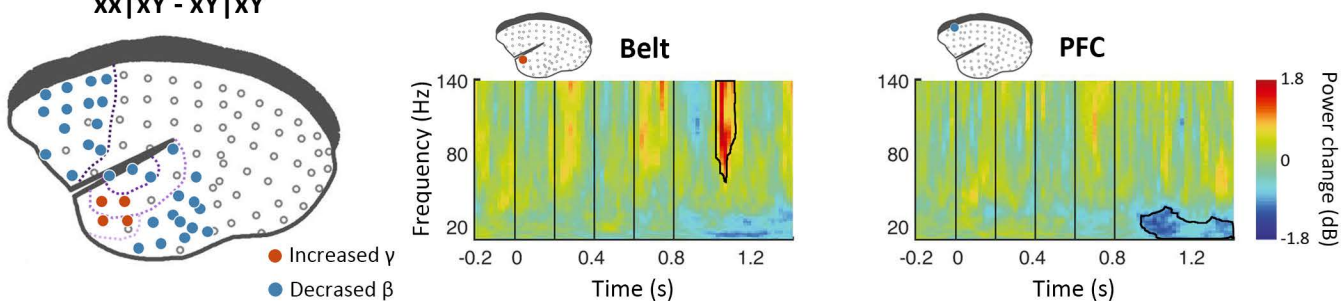

Supplement: supp [file elife_poa_e74653_Figure_2_figure_supplement_1.pdf › elife_poa_e74653_Figure_2_figure_supplement_1.pdf]
