# Supplementary material for: Constructing the hierarchy of predictive auditory sequences in the marmoset brain
Source: eLife journal article supplement (doi:10.7554/elife.74653), 2022-02-17

**A****fMRI 1<sup>st</sup>- & 2<sup>nd</sup>- level novelty activation in xx task****Marmoset 1****Marmoset 2****Marmoset 3**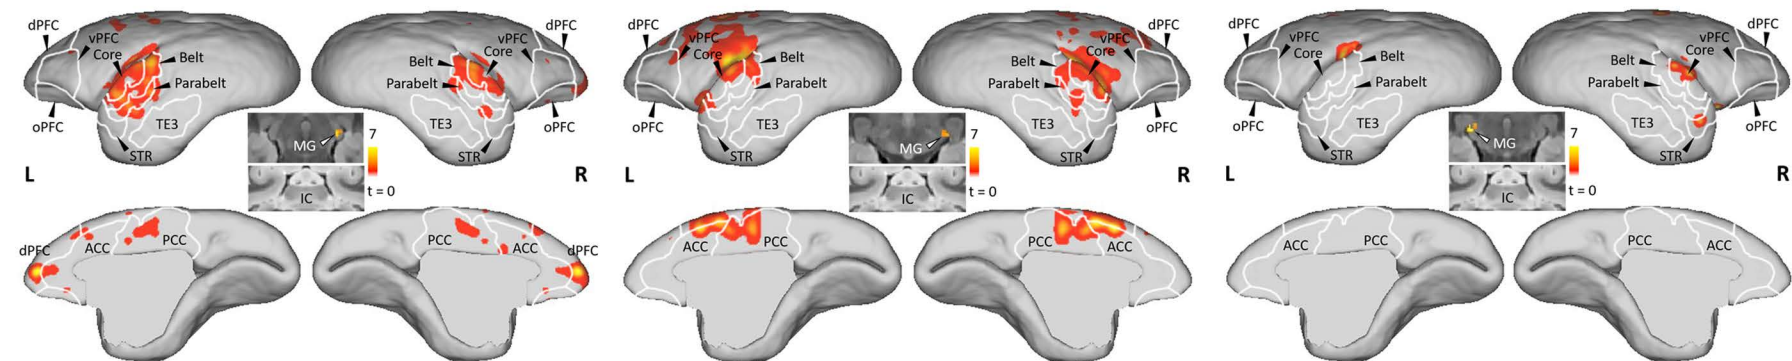**B ECoG response: xY|xx - xx|xx****Time-frequency representation**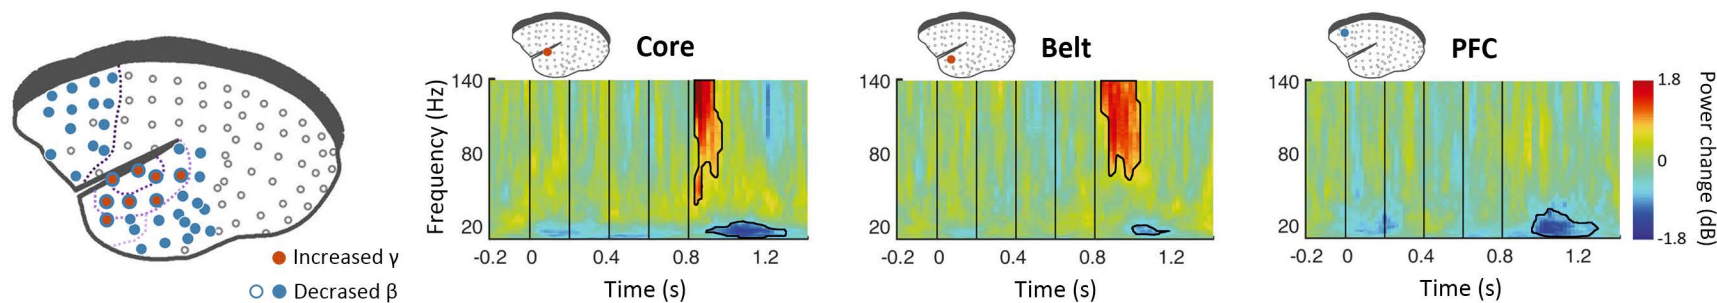**C****Within xY|xx****Within xx|xY****D****Acorss xY|xx and xx|xx****Acorss xx|xY and xY|xY**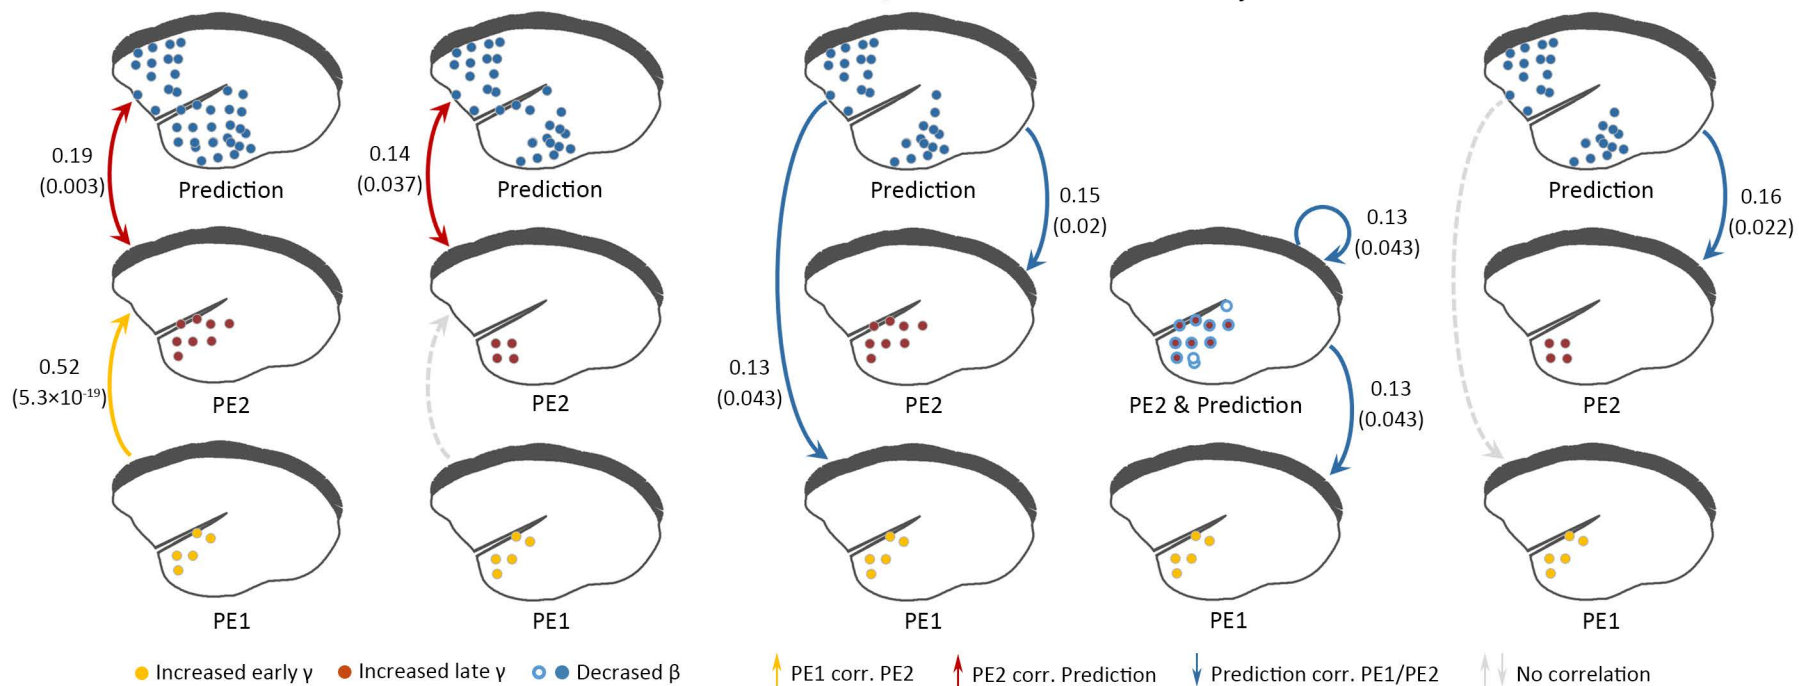

Supplement: supp [file elife_poa_e74653_Figure_3_figure_supplement_1.pdf › elife_poa_e74653_Figure_3_figure_supplement_1.pdf]
