# Supplementary material for: Constructing the hierarchy of predictive auditory sequences in the marmoset brain
Source: eLife journal article supplement (doi:10.7554/elife.74653), 2022-02-17
Supplement: supp [file elife_poa_e74653_Figure_4_figure_supplement_1.pdf › elife_poa_e74653_Figure_4_figure_supplement_1.pdf]

## A fMRI omission activation: $x_{-}|xx-xx|xx$

Marmoset 1

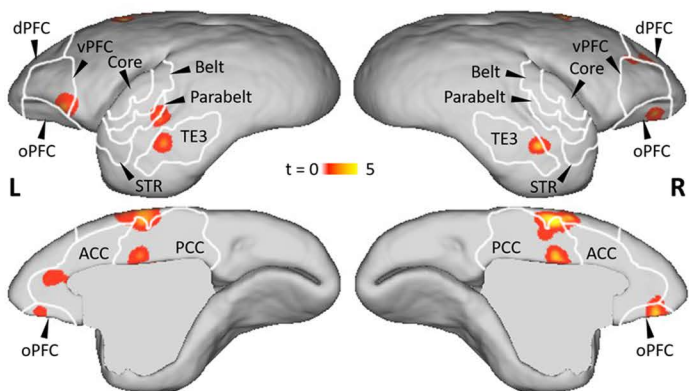

Marmoset 2

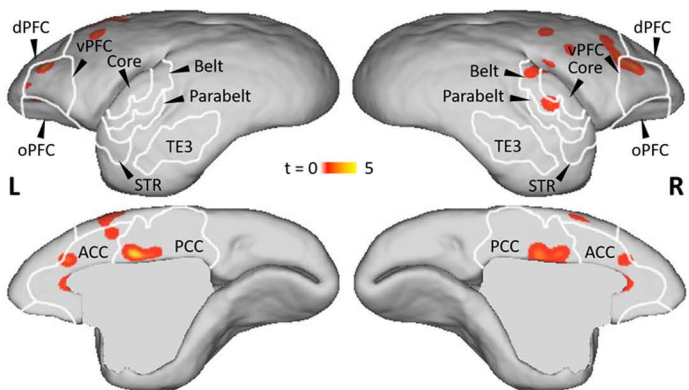

Marmoset 3

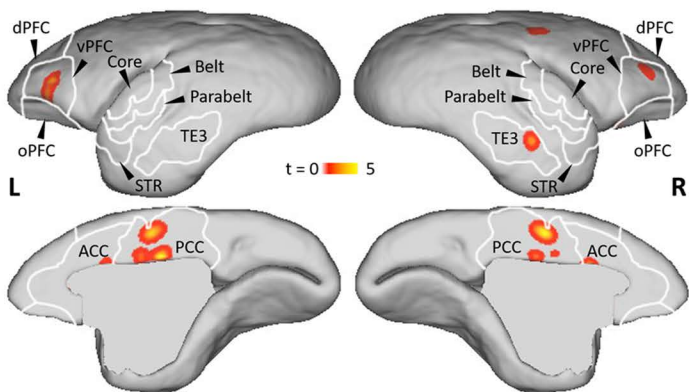

## B fMRI omission activation: $x_{-}|xY-xY|xY$

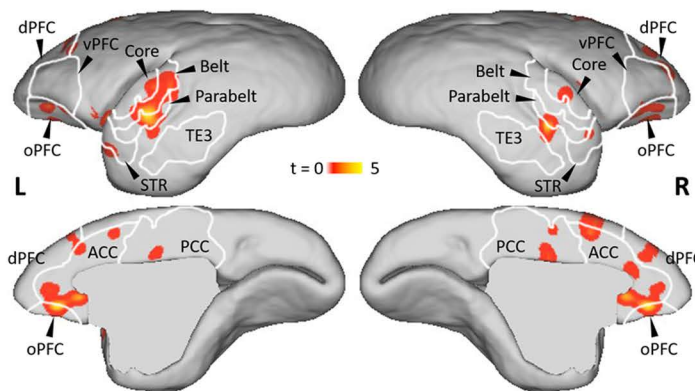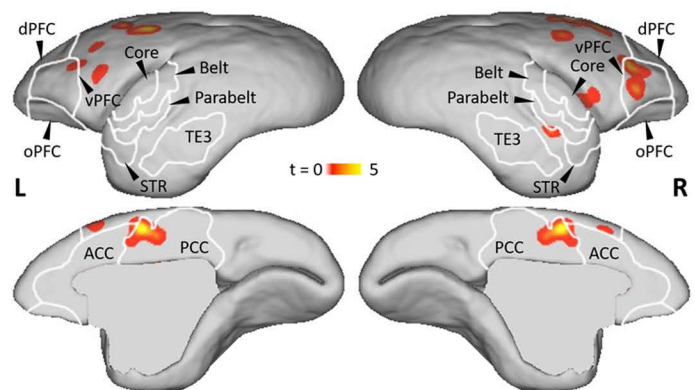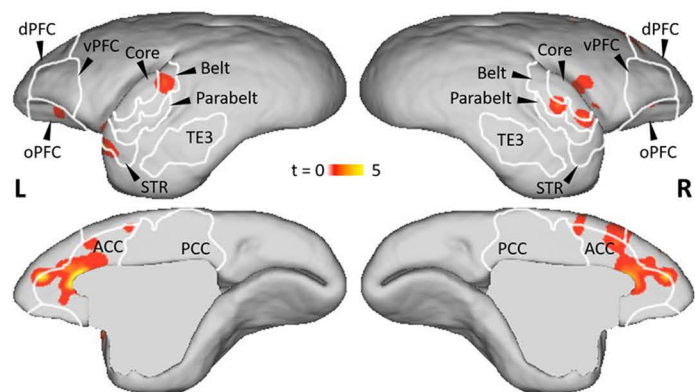

## C ECoG response: $x_{-}|xY$ - omission block (xxxx)

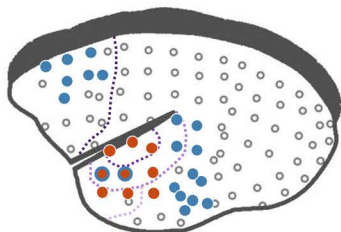

### Time-frequency representation

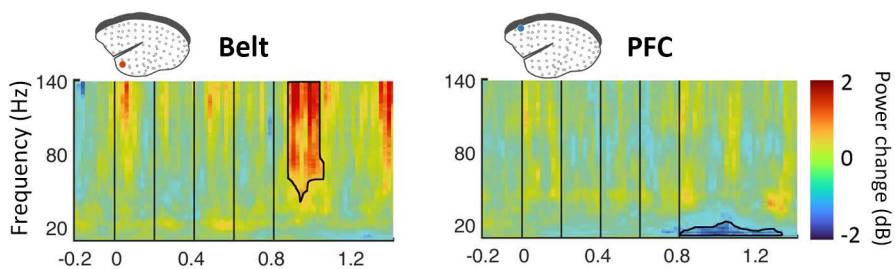

## D $x_{-}|xx$ - omission block (xxxx)

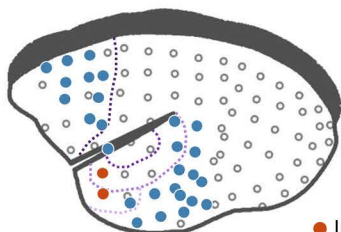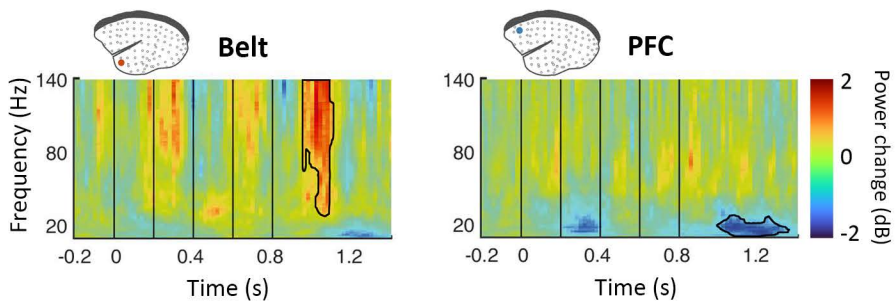

● Increased  $\gamma$   
● Decreased  $\beta$
