# Supplementary material for: Constructing the hierarchy of predictive auditory sequences in the marmoset brain
Source: eLife journal article supplement (doi:10.7554/elife.74653), 2022-02-17

**A**fMRI omission difference:  $x_{-}|xY-x_{-}|xx$ **Marmoset 1****Marmoset 2****Marmoset 3**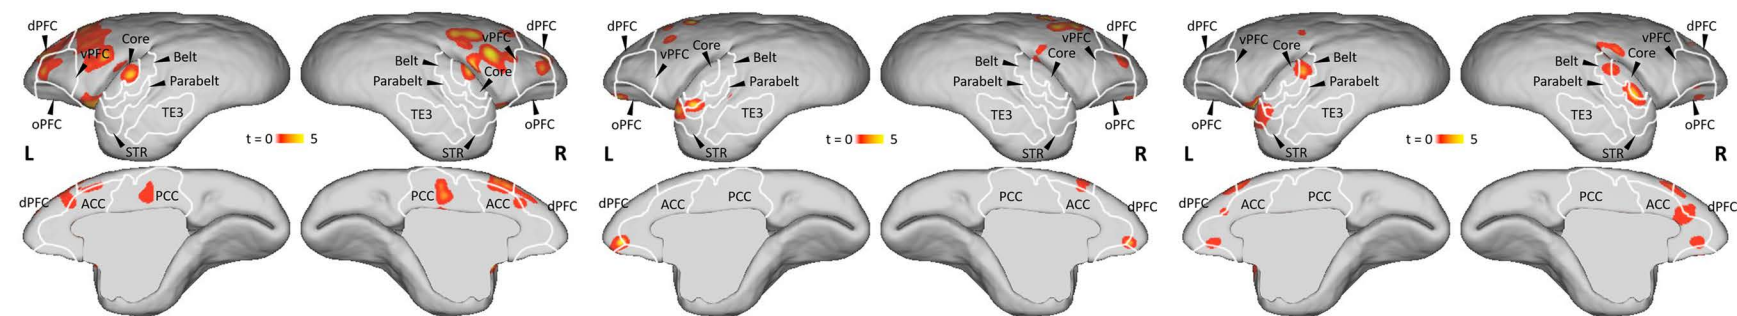**B**ECoG response:  $x_{-}|xY - x_{-}|xx$ 

Time-frequency representation

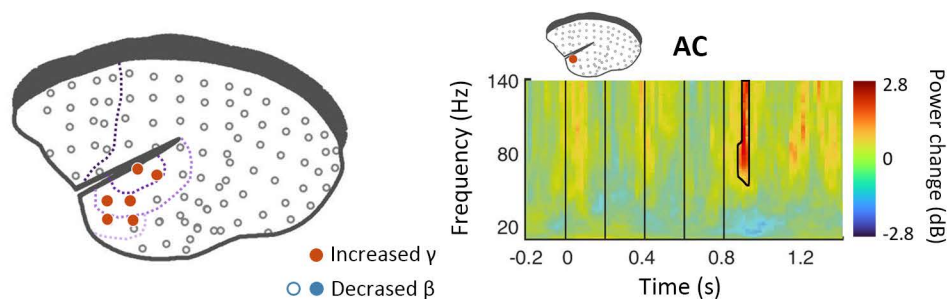**C**Within  $x_{-}|xx$ Within  $x_{-}|xY$ **D** Acorss  $x_{-}|xx$  and  $xx|xx$ Acorss  $x_{-}|xY$  and  $xY|xY$ 

Prediction from PFC and TE

Prediction from AC

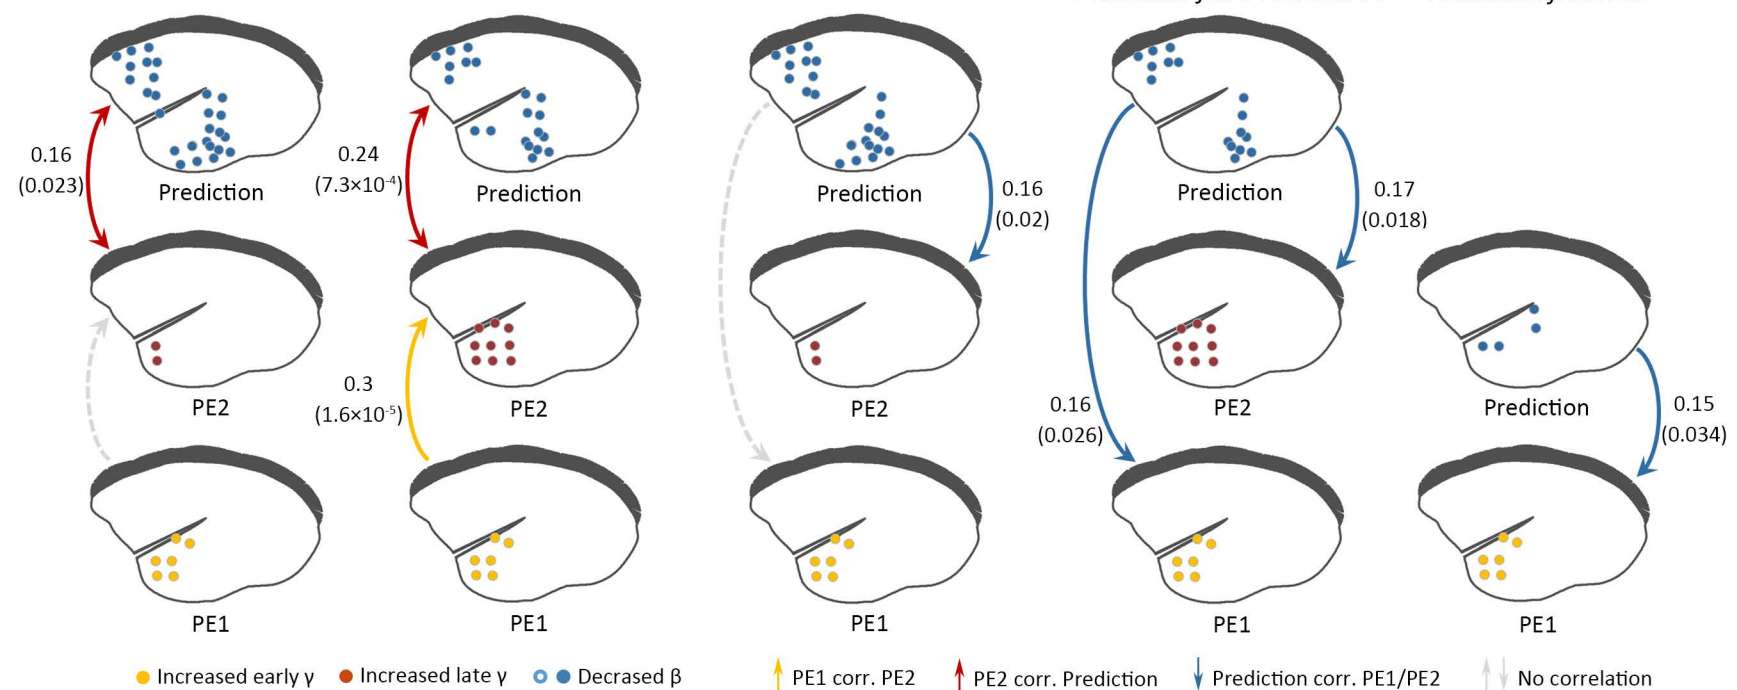

Supplement: supp [file elife_poa_e74653_Figure_5_figure_supplement_1.pdf › elife_poa_e74653_Figure_5_figure_supplement_1.pdf]
